# Supplementary material for: Discovery of Novel c-Jun N-Terminal Kinase 1 Inhibitors from Natural Products: Integrating Artificial Intelligence with Structure-Based Virtual Screening and Biological Evaluation
Source: MDPI journal article supplement (doi:10.3390/molecules27196249), 2022-09-22
Supplement: s1 [file s1]

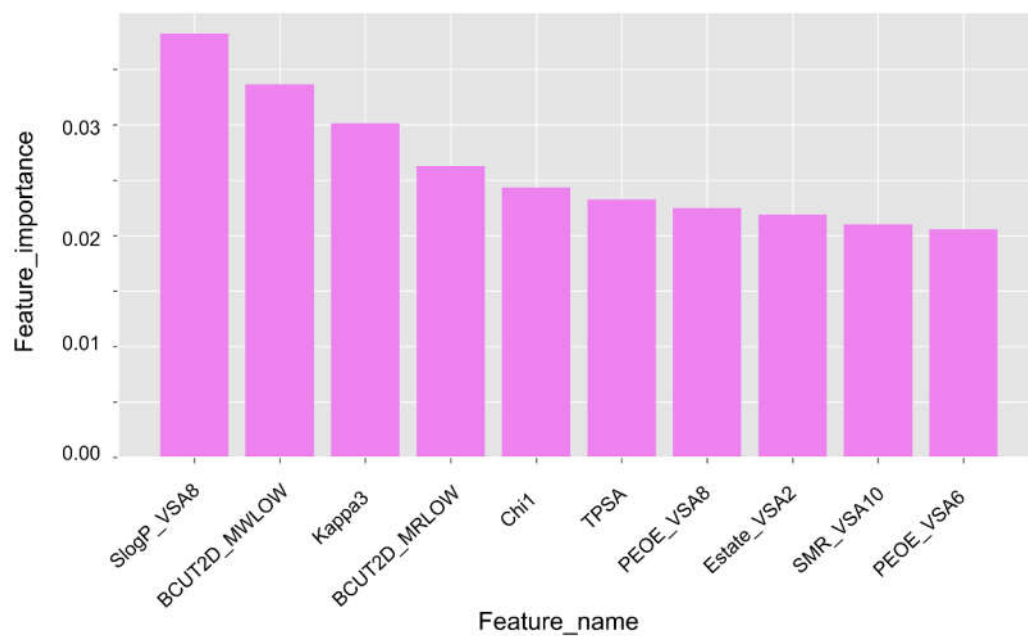

Figure S1. Relative importance ranking of the 10 molecular descriptors most associated with JNK1 inhibitory activity.

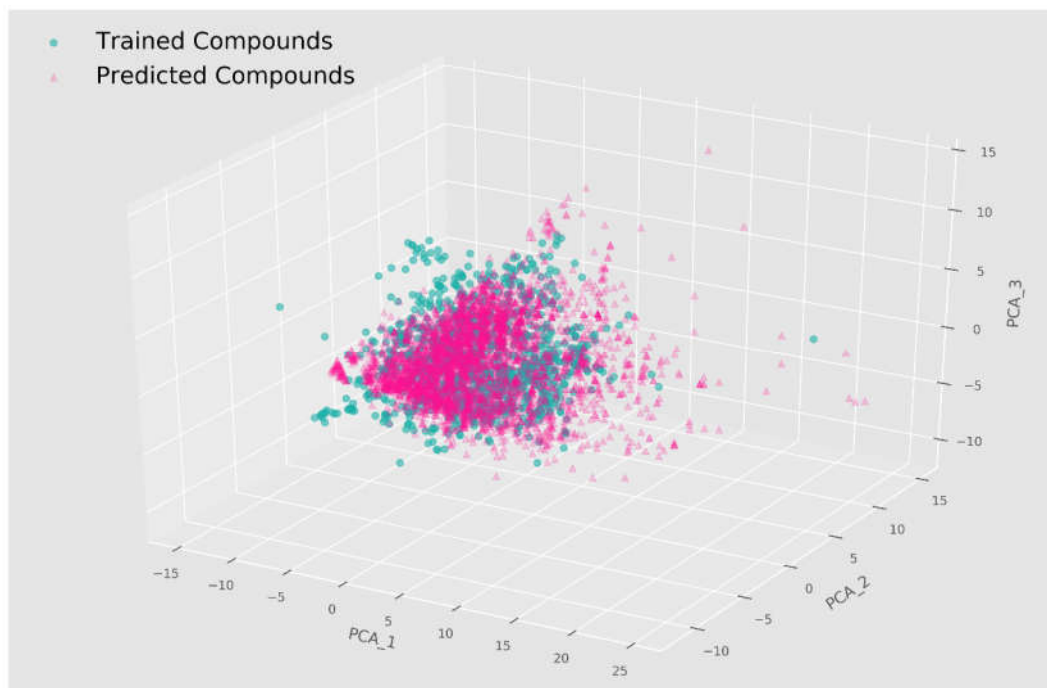

Figure S2. Chemical spatial distribution of the trained compounds and predicted compounds.

Table S1. The details of the descriptors after feature selection.

| Descriptor Name          | Type                     | Dimension | Extended class                 |
|--------------------------|--------------------------|-----------|--------------------------------|
| BalabanJ                 | Balaban's J index        | 2         | Topological descriptors        |
| Chi1                     | Chi indices              | 2         | Connectivity descriptors       |
| Chi2v                    | Chi indices              | 2         | Connectivity descriptors       |
| Chi4n                    | Chi indices              | 2         | Connectivity descriptors       |
| EState_VSA1              | EState_VSA               | 2         | MOE-type descriptors           |
| EState_VSA2              | EState_VSA               | 2         | MOE-type descriptors           |
| EState_VSA3              | EState_VSA               | 2         | MOE-type descriptors           |
| EState_VSA4              | EState_VSA               | 2         | MOE-type descriptors           |
| EState_VSA5              | EState_VSA               | 2         | MOE-type descriptors           |
| EState_VSA6              | EState_VSA               | 2         | MOE-type descriptors           |
| EState_VSA7              | EState_VSA               | 2         | MOE-type descriptors           |
| EState_VSA8              | EState_VSA               | 2         | MOE-type descriptors           |
| EState_VSA9              | EState_VSA               | 2         | MOE-type descriptors           |
| EState_VSA10             | EState_VSA               | 2         | MOE-type descriptors           |
| FractionCSP3             | FractionCSP3             | 1         | Constitutional descriptors     |
| HallKierAlpha            | HallKierAlpha            | 2         | Topological descriptors        |
| Ipc                      | Ipc                      | 2         | Topological descriptors        |
| Kappa3                   | Kappa descriptors        | 2         | Topological descriptors        |
| LabuteASA                | LabuteASA                | 2         | MOE-type descriptors           |
| MolLogP                  | MolLogP                  | 2         | Molecular property descriptors |
| NHOHCount                | NHOHCount                | 1         | Constitutional descriptors     |
| NOCCount                 | NOCCount                 | 1         | Constitutional descriptors     |
| NumAliphaticCarbocycles  | NumAliphaticCarbocycles  | 1         | Constitutional descriptors     |
| NumAliphaticHeterocycles | NumAliphaticHeterocycles | 1         | Constitutional descriptors     |
| NumAromaticHeterocycles  | NumAromaticHeterocycles  | 1         | Constitutional descriptors     |
| NumAromaticRings         | NumAromaticRings         | 1         | Constitutional descriptors     |
| NumHAcceptors            | NumHAcceptors            | 1         | Constitutional descriptors     |
| NumHeteroatoms           | NumHeteroatoms           | 1         | Constitutional descriptors     |
| NumRotatableBonds        | NumRotatableBonds        | 1         | Constitutional descriptors     |
| NumSaturatedRings        | NumSaturatedRings        | 1         | Constitutional descriptors     |
| BCUT2D_MWHI              | BCUT                     | 2         | BCUT descriptors               |
| BCUT2D_MWLOW             | BCUT                     | 2         | BCUT descriptors               |
| BCUT2D_CHGHI             | BCUT                     | 2         | BCUT descriptors               |
| BCUT2D_CHGLO             | BCUT                     | 2         | BCUT descriptors               |
| BCUT2D_LOGPHI            | BCUT                     | 2         | BCUT descriptors               |
| BCUT2D_LOGPLOW           | BCUT                     | 2         | BCUT descriptors               |
| BCUT2D_MRHI              | BCUT                     | 2         | BCUT descriptors               |
| BCUT2D_MRLOW             | BCUT                     | 2         | BCUT descriptors               |
| PEOE_VSA1                | PEOE_VSA                 | 2         | MOE-type descriptors           |

|              |            |   |                                |
|--------------|------------|---|--------------------------------|
| PEOE_VSA2    | PEOE_VSA   | 2 | MOE-type descriptors           |
| PEOE_VSA3    | PEOE_VSA   | 2 | MOE-type descriptors           |
| PEOE_VSA4    | PEOE_VSA   | 2 | MOE-type descriptors           |
| PEOE_VSA5    | PEOE_VSA   | 2 | MOE-type descriptors           |
| PEOE_VSA6    | PEOE_VSA   | 2 | MOE-type descriptors           |
| PEOE_VSA7    | PEOE_VSA   | 2 | MOE-type descriptors           |
| PEOE_VSA8    | PEOE_VSA   | 2 | MOE-type descriptors           |
| PEOE_VSA9    | PEOE_VSA   | 2 | MOE-type descriptors           |
| PEOE_VSA10   | PEOE_VSA   | 2 | MOE-type descriptors           |
| PEOE_VSA11   | PEOE_VSA   | 2 | MOE-type descriptors           |
| PEOE_VSA13   | PEOE_VSA   | 2 | MOE-type descriptors           |
| RingCount    | RingCount  | 1 | Constitutional descriptors     |
| SMR_VSA1     | SMR_VSA    | 2 | MOE-type descriptors           |
| SMR_VSA2     | SMR_VSA    | 2 | MOE-type descriptors           |
| SMR_VSA3     | SMR_VSA    | 2 | MOE-type descriptors           |
| SMR_VSA4     | SMR_VSA    | 2 | MOE-type descriptors           |
| SMR_VSA5     | SMR_VSA    | 2 | MOE-type descriptors           |
| SMR_VSA6     | SMR_VSA    | 2 | MOE-type descriptors           |
| SMR_VSA7     | SMR_VSA    | 2 | MOE-type descriptors           |
| SMR_VSA9     | SMR_VSA    | 2 | MOE-type descriptors           |
| SMR_VSA10    | SMR_VSA    | 2 | MOE-type descriptors           |
| SlogP_VSA1   | SlogP_VSA  | 2 | MOE-type descriptors           |
| SlogP_VSA2   | SlogP_VSA  | 2 | MOE-type descriptors           |
| SlogP_VSA3   | SlogP_VSA  | 2 | MOE-type descriptors           |
| SlogP_VSA4   | SlogP_VSA  | 2 | MOE-type descriptors           |
| SlogP_VSA5   | SlogP_VSA  | 2 | MOE-type descriptors           |
| SlogP_VSA8   | SlogP_VSA  | 2 | MOE-type descriptors           |
| SlogP_VSA10  | SlogP_VSA  | 2 | MOE-type descriptors           |
| SlogP_VSA11  | SlogP_VSA  | 2 | MOE-type descriptors           |
| SlogP_VSA12  | SlogP_VSA  | 2 | MOE-type descriptors           |
| TPSA         | TPSA       | 2 | Molecular property descriptors |
| VSA_EState1  | VSA_Estate | 2 | MOE-type descriptors           |
| VSA_EState2  | VSA_Estate | 2 | MOE-type descriptors           |
| VSA_EState3  | VSA_Estate | 2 | MOE-type descriptors           |
| VSA_EState4  | VSA_Estate | 2 | MOE-type descriptors           |
| VSA_EState5  | VSA_Estate | 2 | MOE-type descriptors           |
| VSA_EState6  | VSA_Estate | 2 | MOE-type descriptors           |
| VSA_EState7  | VSA_Estate | 2 | MOE-type descriptors           |
| VSA_EState8  | VSA_Estate | 2 | MOE-type descriptors           |
| VSA_EState9  | VSA_Estate | 2 | MOE-type descriptors           |
| VSA_EState10 | VSA_Estate | 2 | MOE-type descriptors           |
| fr_Al_COO    | fr_Al_COO  | 1 | Constitutional descriptors     |
| fr_Al_OH     | fr_Al_OH   | 1 | Constitutional descriptors     |
| fr_Ar_N      | fr_Ar_N    | 1 | Constitutional descriptors     |

|                       |                       |   |                            |
|-----------------------|-----------------------|---|----------------------------|
| fr_Ar_OH              | fr_Ar_OH              | 1 | Constitutional descriptors |
| fr_COO                | fr_COO                | 1 | Constitutional descriptors |
| fr_C_O                | fr_C_O                | 1 | Constitutional descriptors |
| fr_C_S                | fr_C_S                | 1 | Constitutional descriptors |
| fr_NH0                | fr_NH0                | 1 | Constitutional descriptors |
| fr_NH1                | fr_NH1                | 1 | Constitutional descriptors |
| fr_Ndealkylation2     | fr_Ndealkylation2     | 1 | Constitutional descriptors |
| fr_Nhpyrrole          | fr_Nhpyrrole          | 1 | Constitutional descriptors |
| fr_SH                 | fr_SH                 | 1 | Constitutional descriptors |
| fr_allylic_oxid       | fr_allylic_oxid       | 1 | Constitutional descriptors |
| fr_amide              | fr_amide              | 1 | Constitutional descriptors |
| fr_amidine            | fr_amidine            | 1 | Constitutional descriptors |
| fr_aniline            | fr_aniline            | 1 | Constitutional descriptors |
| fr_aryl_methyl        | fr_aryl_methyl        | 1 | Constitutional descriptors |
| fr_azo                | fr_azo                | 1 | Constitutional descriptors |
| fr_diazo              | fr_diazo              | 1 | Constitutional descriptors |
| fr_benzene            | fr_benzene            | 1 | Constitutional descriptors |
| fr_ester              | fr_ester              | 1 | Constitutional descriptors |
| fr_ether              | fr_ether              | 1 | Constitutional descriptors |
| fr_furan              | fr_furan              | 1 | Constitutional descriptors |
| fr_halogen            | fr_halogen            | 1 | Constitutional descriptors |
| fr_ketone_Topliss     | fr_ketone_Topliss     | 1 | Constitutional descriptors |
| fr_morpholine         | fr_morpholine         | 1 | Constitutional descriptors |
| fr_nitro              | fr_nitro              | 1 | Constitutional descriptors |
| fr_oxazole            | fr_oxazole            | 1 | Constitutional descriptors |
| fr_para_hydroxylation | fr_para_hydroxylation | 1 | Constitutional descriptors |
| fr_priamide           | fr_priamide           | 1 | Constitutional descriptors |
| fr_pyridine           | fr_pyridine           | 1 | Constitutional descriptors |
| fr_sulfonamd          | fr_sulfonamd          | 1 | Constitutional descriptors |
| fr_sulfone            | fr_sulfone            | 1 | Constitutional descriptors |
| fr_tetrazole          | fr_tetrazole          | 1 | Constitutional descriptors |
| fr_urea               | fr_urea               | 1 | Constitutional descriptors |
| MaxEStateIndex        | Estate Index          | 2 | Topological descriptors    |
| MaxPartialCharge      | Partial Charge        | 2 | Topological descriptors    |
| MinAbsEStateIndex     | Estate Index          | 2 | Topological descriptors    |
| MinEStateIndex        | Estate Index          | 2 | Topological descriptors    |
| MinPartialCharge      | Partial Charge        | 2 | Topological descriptors    |

---
